# Supplementary material
Source: PubMed Central journal article supplement (PMC8826802)
Supplement: jvi.01985-21-s0001.pdf [file jvi.01985-21-s0001.pdf]

## A Mouse HVEM and TTG sncRNA1

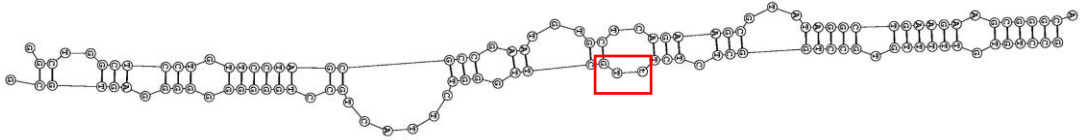

Mfe: -49.2 kcal/mol

## B Mouse HVEM and TTG sncRNA2

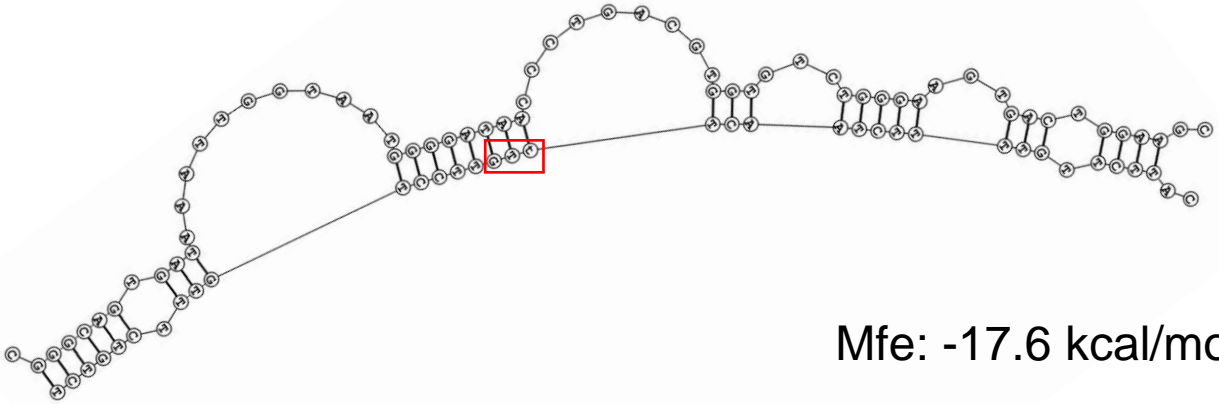

Mfe: -17.6 kcal/mol

**Supplemental Fig. 1.** Computational prediction of the single nucleotide mutant TTG sncRNA1 (A) and TTG sncRNA2 (B) bound to the HVEM promoter. Mfe indicates minimum free energy of binding predicted by RNA hybrid algorithm. Red boxes indicate position of the TTG mutations within the sncRNAs.

**A** WT sncRNA1  
Mfe: -18.49 kcal/mol

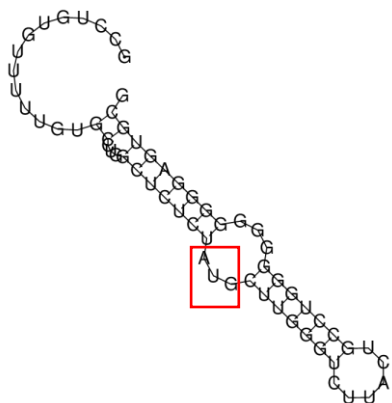

**B** TTG sncRNA1  
Mfe: -21.77 kcal/mol

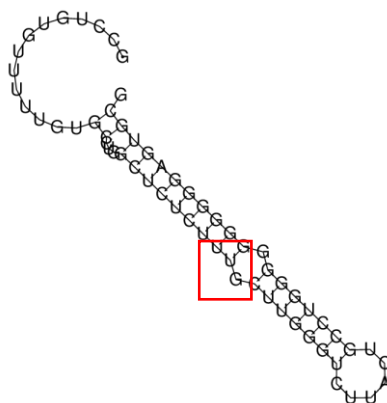

**C** WT sncRNA2  
Mfe: -0.49 kcal/mol

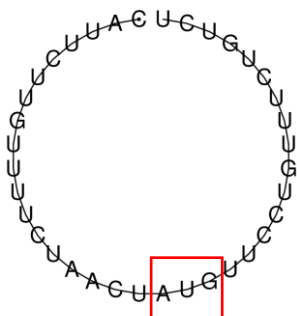

**D** TTG sncRNA2  
Mfe: -0.44 kcal/mol

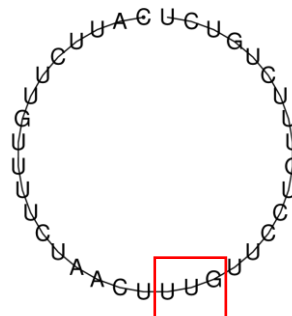

**Supplemental Fig. 2.** Computational prediction of the folded structures of (A) WT sncRNA1, (B) sncRNA1 TTG mutant, (C) WT sncRNA2 and (D) sncRNA2 TTG mutant. Mfe indicates minimum free energy of the folded structure. Red boxes indicate the location of the ATG in WT sncRNA1 (A) and sncRNA2 (C) and the single nucleotide mutation in the sncRNA1 (B) and sncRNA2 TTG (D) mutants.
